# Supplementary material for: Hypermethylation of PRKCZ Regulated by E6 Inhibits Invasion and EMT via Cdc42 in HPV-Related Head and Neck Squamous Cell Carcinoma
Source: MDPI journal article supplement (doi:10.3390/cancers14174151), 2022-08-27
Supplement: s1 [file s1]

# Supplementary Material: Hypermethylation of PRKCZ Regulated by E6 Inhibits Invasion and EMT via Cdc42 in HPV-Related Head and Neck Squamous Cell Carcinoma

Hao-Fan Wang, Jian Jiang, Jia-Shun Wu, Mei Zhang, Xin Pang, Li Dai, Ya-Ling Tang \*  
and Xin-Hua Liang \*

**Table S1.** The top 25 abnormally hypermethylated genes in HPV+ HNSCC tissue compared with HPV- HNSCC tissue.

| Gene Name | Target ID  | case.<br>AVG_Beta | case.<br>DiffScore | case.<br>Delta Beta | case.<br>Detection<br>Pval | control.<br>AVG_Beta | control.<br>Detection Pva |
|-----------|------------|-------------------|--------------------|---------------------|----------------------------|----------------------|---------------------------|
| ASCL4     | cg20443254 | 0.294272          | 48.16483           | 0.218263            | 0                          | 0.076009             | 0                         |
| NEFM      | cg07502389 | 0.291245          | 44.35434           | 0.193643            | 0                          | 0.097601             | 0                         |
| LINGO3    | cg19241679 | 0.305958          | 38.99714           | 0.189708            | 0                          | 0.11625              | 0                         |
| NLRC4     | cg22805603 | 0.714048          | 38.6867            | 0.232118            | 0                          | 0.48193              | 0                         |
| CLEC4GP1  | cg24889914 | 0.46479           | 38.30906           | 0.203835            | 0                          | 0.260955             | 0                         |
| LRP1B     | cg00603435 | 0.624908          | 37.18912           | 0.206679            | 0                          | 0.418229             | 0                         |
| SCOC      | cg13913247 | 0.821391          | 32.91441           | 0.200871            | 0                          | 0.62052              | 0                         |
| PTGFR     | cg27046936 | 0.361525          | 32.68072           | 0.247227            | 0                          | 0.114298             | 0                         |
| ZIC2      | cg24690071 | 0.356628          | 32.35521           | 0.19429             | 0                          | 0.162338             | 0                         |
| GLRA1     | cg12995800 | 0.237169          | 28.96347           | 0.190496            | 0                          | 0.046672             | 0                         |
| TBX18     | cg07028914 | 0.346965          | 28.67912           | 0.257072            | 0                          | 0.089893             | 0                         |
| GJB6      | cg07610777 | 0.557075          | 28.15817           | 0.247783            | 0                          | 0.309292             | 0                         |
| MAPT      | cg18228076 | 0.576034          | 28.09607           | 0.254003            | 0                          | 0.322031             | 0                         |
| LYNX1     | cg04688828 | 0.247635          | 28.07237           | 0.191953            | 0                          | 0.055682             | 0                         |
| CCDC3     | cg03540175 | 0.430408          | 27.85628           | 0.184329            | 0                          | 0.246079             | 0                         |
| C2orf39   | cg04726446 | 0.266014          | 27.42363           | 0.177761            | 0                          | 0.088253             | 0                         |
| SYCN      | cg02863073 | 0.241393          | 26.401             | 0.189945            | 0                          | 0.051448             | 0                         |
| C1orf106  | cg00909514 | 0.256152          | 26.32339           | 0.236464            | 0                          | 0.019688             | 0                         |
| SNTG1     | cg14291467 | 0.661534          | 25.96148           | 0.254655            | 0                          | 0.406879             | 0                         |
| PRKCZ     | cg06157219 | 0.405768          | 25.67634           | 0.198964            | 0                          | 0.206804             | 0                         |
| ZFP37     | cg03454353 | 0.349559          | 25.53246           | 0.172653            | 0                          | 0.176906             | 0                         |
| ACCN4     | cg19210770 | 0.266877          | 25.50808           | 0.179662            | 0                          | 0.087215             | 0                         |
| CLEC4D    | cg01253753 | 0.613357          | 25.28931           | 0.191497            | 0                          | 0.42186              | 0                         |
| PDZRN3    | cg14473924 | 0.439253          | 24.9945            | 0.242738            | 0                          | 0.196515             | 0                         |
| DTNA      | cg02790691 | 0.673311          | 24.91104           | 0.190286            | 0                          | 0.483026             | 0                         |

**Table S2.** The top 25 abnormally hypomethylated genes in HPV+ HNSCC tissue compared with HPV- HNSCC tissue.

| Gene Name | Target ID  | case.<br>AVG Beta | case.<br>DiffScore | case.<br>Delta Beta | case.<br>Detection Pval | control.<br>AVG Beta | control.<br>Detection Pval |
|-----------|------------|-------------------|--------------------|---------------------|-------------------------|----------------------|----------------------------|
| NR2F1     | cg08969950 | 0.329318          | -19.1478           | -0.20643            | 0                       | 0.53575              | 0                          |
| CNGA3     | cg22241124 | 0.519476          | -19.5996           | -0.19182            | 0                       | 0.7113               | 0                          |
| EBF2      | cg16895719 | 0.386037          | -19.7555           | -0.17668            | 0                       | 0.562714             | 0                          |
| GLI3      | cg18100008 | 0.606943          | -19.8773           | -0.17067            | 0                       | 0.777615             | 0                          |
| LRRN4     | cg19097280 | 0.581911          | -19.936            | -0.18212            | 0                       | 0.764033             | 0                          |
| HOXD8     | cg03321133 | 0.291694          | -20.2312           | -0.19908            | 0                       | 0.490772             | 0                          |
| OR9Q1     | cg05922911 | 0.677669          | -20.2602           | -0.18958            | 0                       | 0.867245             | 0                          |
| DLX1      | cg15552158 | 0.330394          | -21.3701           | -0.2068             | 0                       | 0.537197             | 0                          |
| SOX9      | cg11350586 | 0.381243          | -21.4671           | -0.22397            | 0                       | 0.605209             | 0                          |
| TMEM232   | cg06414816 | 0.441568          | -21.829            | -0.1919             | 0                       | 0.633469             | 0                          |
| BOC       | cg07481097 | 0.492096          | -22.1367           | -0.18447            | 0                       | 0.676565             | 0                          |
| RUNX3     | cg00147638 | 0.601542          | -22.6817           | -0.20773            | 0                       | 0.809276             | 0                          |
| LHX8      | cg09222749 | 0.231537          | -23.1813           | -0.17586            | 0                       | 0.407392             | 0                          |
| DMRT2     | cg00934355 | 0.365495          | -23.6385           | -0.21379            | 0                       | 0.579286             | 0                          |
| HOXD9     | cg09173768 | 0.417908          | -23.6387           | -0.27434            | 0                       | 0.692252             | 0                          |
| HOXD3     | cg00005847 | 0.320798          | -23.7948           | -0.28368            | 0                       | 0.604473             | 0                          |
| PTCHD3    | cg04500084 | 0.564269          | -25.2987           | -0.21899            | 0                       | 0.783258             | 0                          |
| SECTM1    | cg27666046 | 0.462912          | -26.6919           | -0.17257            | 0                       | 0.635485             | 0                          |
| SLC38A1   | cg17090968 | 0.340748          | -29.6816           | -0.31124            | 0                       | 0.651988             | 0                          |
| FHIT      | cg21541638 | 0.337263          | -31.1058           | -0.22638            | 0                       | 0.56364              | 0                          |
| SP9       | cg00928397 | 0.27409           | -31.5759           | -0.20606            | 0                       | 0.480155             | 0                          |
| POU4F1    | cg06675375 | 0.185358          | -32.8697           | -0.19039            | 0                       | 0.375743             | 0                          |
| HOXD4     | cg12127282 | 0.44339           | -36.5882           | -0.25385            | 0                       | 0.697236             | 0                          |
| AXIN2     | cg17797591 | 0.325205          | -40.421            | -0.24282            | 0                       | 0.568027             | 0                          |
| MACROD2   | cg09937190 | 0.52854           | -42.1664           | -0.27296            | 0                       | 0.801501             | 0                          |

**Table S3.** Clinicopathological Characteristics of Patients whose tissue specimens were used for qMSP.

| Parameters         | HPV+            | HPV-            |
|--------------------|-----------------|-----------------|
|                    | Number of cases | Number of cases |
| Age                |                 |                 |
| <60                | 4               | 14              |
| >60                | 6               | 16              |
| Gender             |                 |                 |
| Male               | 7               | 21              |
| Female             | 3               | 9               |
| T stage            |                 |                 |
| T1                 | 2               | 8               |
| T2                 | 3               | 11              |
| T3                 | 5               | 7               |
| T4                 | 0               | 4               |
| Pathological grade |                 |                 |
| G1                 | 2               | 16              |
| G2                 | 1               | 10              |
| G3                 | 7               | 4               |
| Metastasis         |                 |                 |
| Yes                | 3               | 9               |
| No                 | 7               | 21              |
| Recurrence         |                 |                 |
| Yes                | 3               | 5               |
| No                 | 7               | 25              |

**Table S4.** Clinicopathological Characteristics of Patients whose tissue specimens were used for array.

|                    | Case 1   | Case 3   | Case 4   | Case 5   | Case B   | Case C   |
|--------------------|----------|----------|----------|----------|----------|----------|
| Age                | 66       | 68       | 44       | 58       | 78       | 61       |
| Gender             | Male     | Male     | Male     | Male     | Male     | Male     |
| T stage            | 4        | 3        | 3        | 4        | 2        | 2        |
| Pathological grade | III      | II       | I        | I        | I        | II       |
| Metastasis         | Yes      | Yes      | No       | No       | No       | Yes      |
| Recurrence         | Yes      | No       | No       | No       | No       | Yes      |
| HPV status         | Positive | Positive | Positive | Negative | Negative | Negative |

**Table S5.** Primers of genes for qRT-PCR.

| Gene     | Forward primer                 | Reverse primer                  |
|----------|--------------------------------|---------------------------------|
| GAPDH    | TGGCCAAGGTCATCCATGAC           | TGTCATACCAGGAAATGAGCTTG         |
| PRKCZ    | AAATCTCTCAGGGGCTTG             | TCACCACTTTCATGGCGTA             |
| HPV-E6   | GAGAACTGCAATGTTTCAGGACC        | TGTATAGTTGTTTGCAGCTCTGTGC       |
| HPV-E7   | CGGAATTCATGCATGGAGATACACCTACAT | CGGGAAGCTTATGGTTTCTGAGAACAGATGG |
| DNMT1    | TACCTGGACGACCCTGACCTC          | CGTTGGCATCAAAGATGGACA           |
| DNMT3a   | TATTGATGAGCGCACAAAGAGAGC       | GGGTGTTCCAGGGTAACATTGAG         |
| DNMT3b   | GGCAAGTTCTCCGAGGTCTCTG         | TGGTACATGGCTTTTCGATAGGA         |
| Rap1A    | CGTGAGTACAAGCTAGTGGTCC         | CCAGGATTCGAGCATACTG             |
| Rap1B    | AACAGATTCTTCGAGTTAAAGACACTGA   | TTTGACCTTGTTTCCTCCCTACA         |
| Rac1     | ATAGGCCAGATTCACTGGTT           | GAGACGGAGCTGTTGGTAAAA           |
| Cdc42    | CAAGGACATTTGTTTGCCATT          | TTTGGTGCATTTCAAAGGTG            |
| RhoA     | TATCGAGGTGGATGGAAAGC           | TTCTGGGGTCCACTTTTCTG            |
| RhoB     | TTGTGCCTGTCCTAGAAGTG           | CAAGTGTGGTCAGAATGCTAC           |
| Epac1    | CCTCTCCAACCTCGGTGAAGC          | CTGGCTGAACAACACGGTC             |
| E-cad    | ACATACACTCTCTTCTCTC            | GTCATTCTGATCGGTAC               |
| N-cad    | ATCATCCTGCTTATCCTT             | TTATCTCTACATCATCTTCTG           |
| Vimentin | CTGAGGGAACTAATCTG              | TTGATAACCTGTCCATCT              |

**Table S6.** SiRNA sequences of genes.

| Gene          | Sequence (5'-3')                                 |
|---------------|--------------------------------------------------|
| E6 siRNA-2    | GGUCGAUGUAUGUCUUGUUTTAACAAGACAUACAUCGACCTT       |
| E7 siRNA-3    | UAACAGUAGAGAUCAAGUUGUCCAACUGAUCU-<br>CUACUGUUAUG |
| PRKCZ siRNA-1 | GCAAACUGCUGGUCCAUAATT UUAUGGACCAGCAGUUUGCTT      |
| PRKCZ siRNA-2 | CCGGAAGCAUGACAGCAUUTT AAUGCUGUCAUGCUUCCGGTT      |
| Control siRNA | UUCUCCGAACGUGUCACGUTTACGUGACACGUAUCGGAGAATT      |

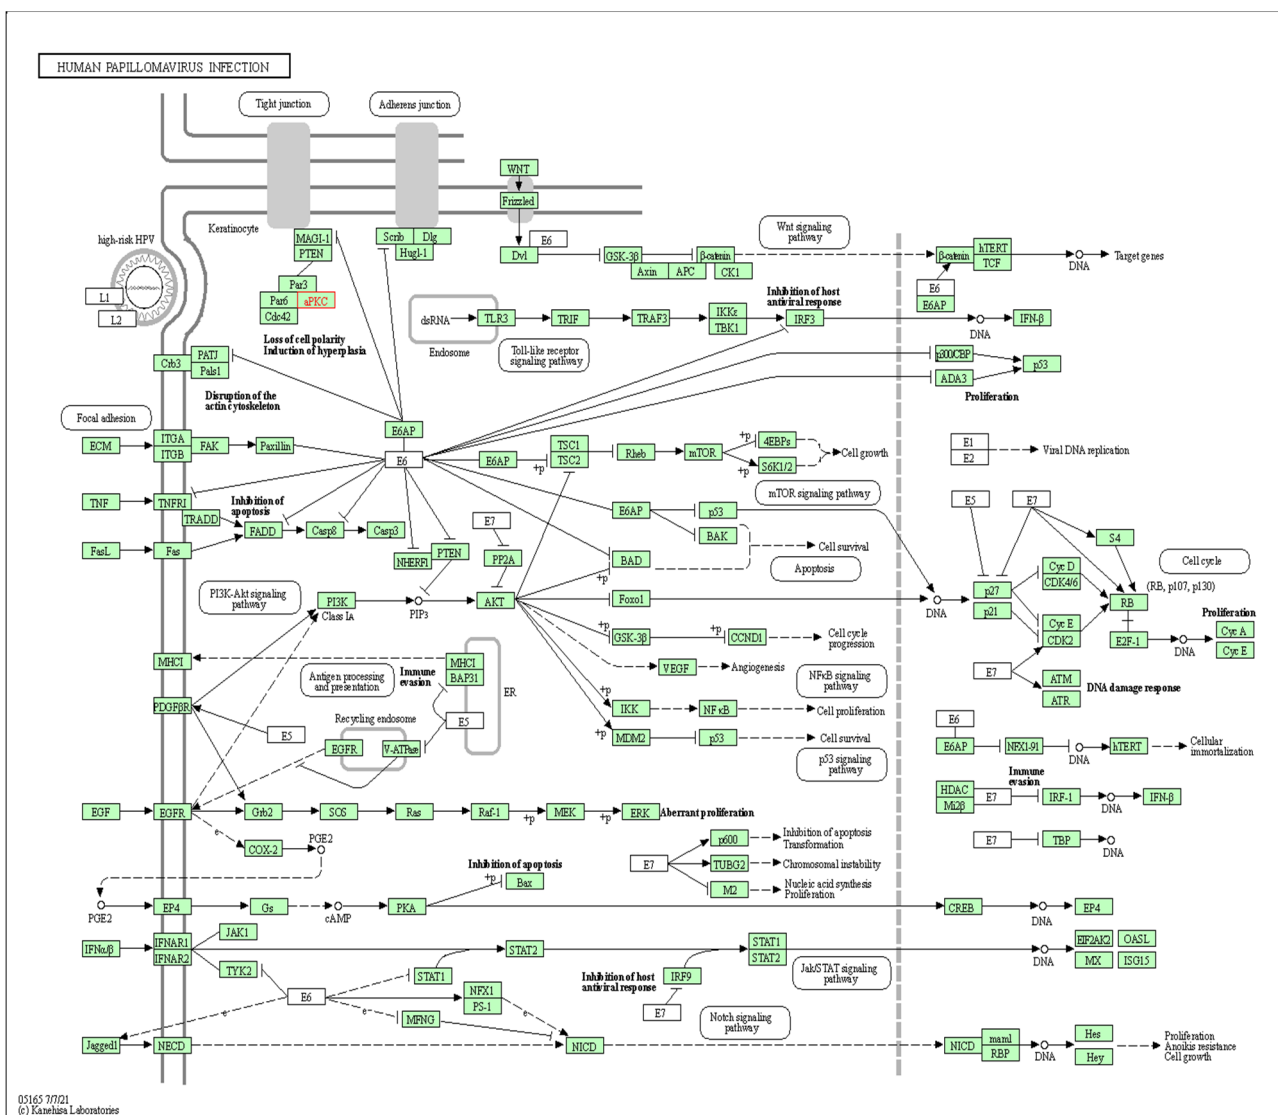

Figure S1. The KEGG pathways of Human papillomavirus infection.

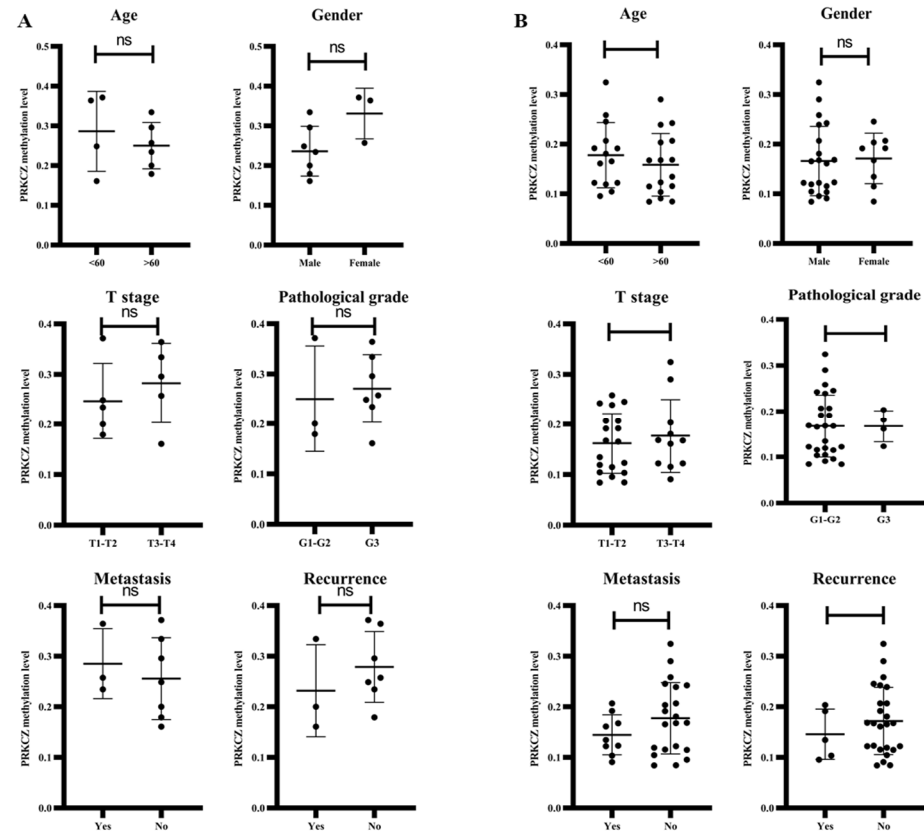

**Figure S2.** The relations between PRKCZ methylation status and relevant clinical and pathological parameters of HPV+ and HPV- patients.

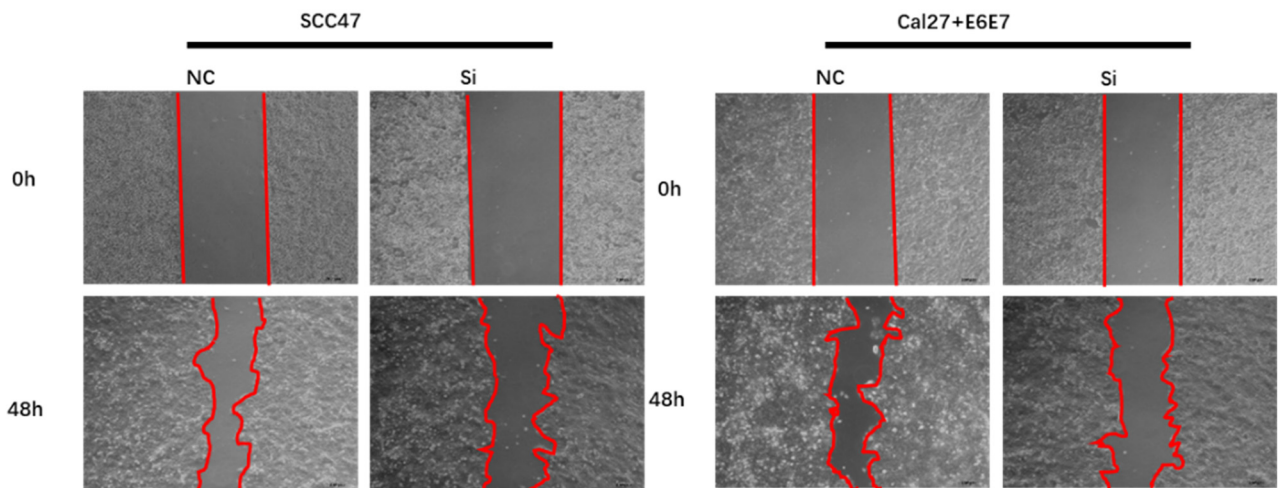

**Figure S3.** The results of wound healing assays between PRKCZ siRNA and control siRNA groups. The results showed that the wounding healing areas of HPV+ HNSCC cells transfected with PRKCZ siRNA were little than that of transfected with control siRNA.

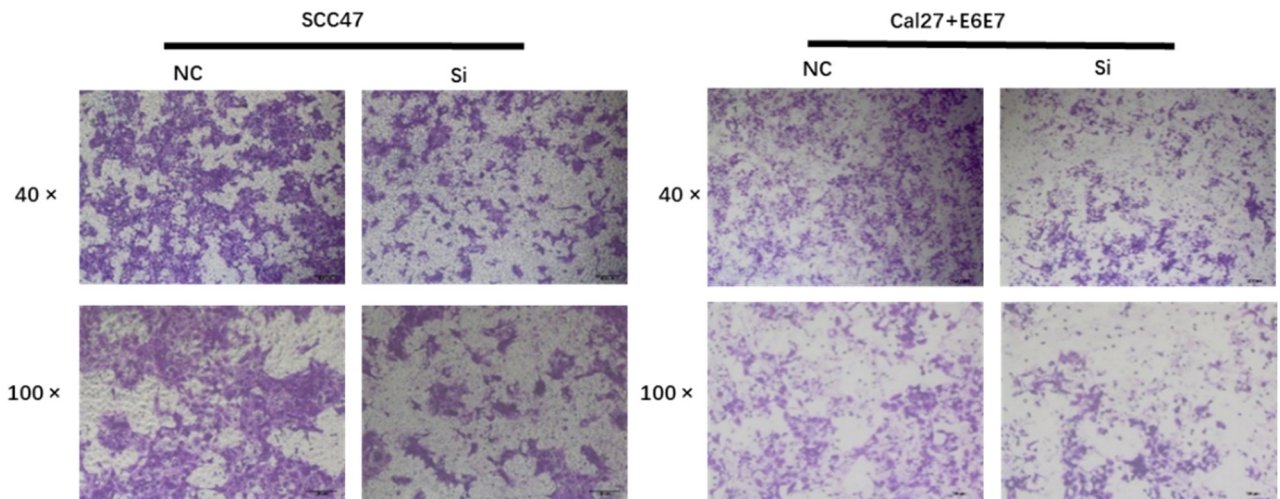

**Figure S4.** The results of transwell invasion assays between PRKCZ siRNA and control siRNA groups. The results showed that the invade cells number of HPV+ HNSCC cells transfected with PRKCZ siRNA were smaller than that of transfected with control siRNA.

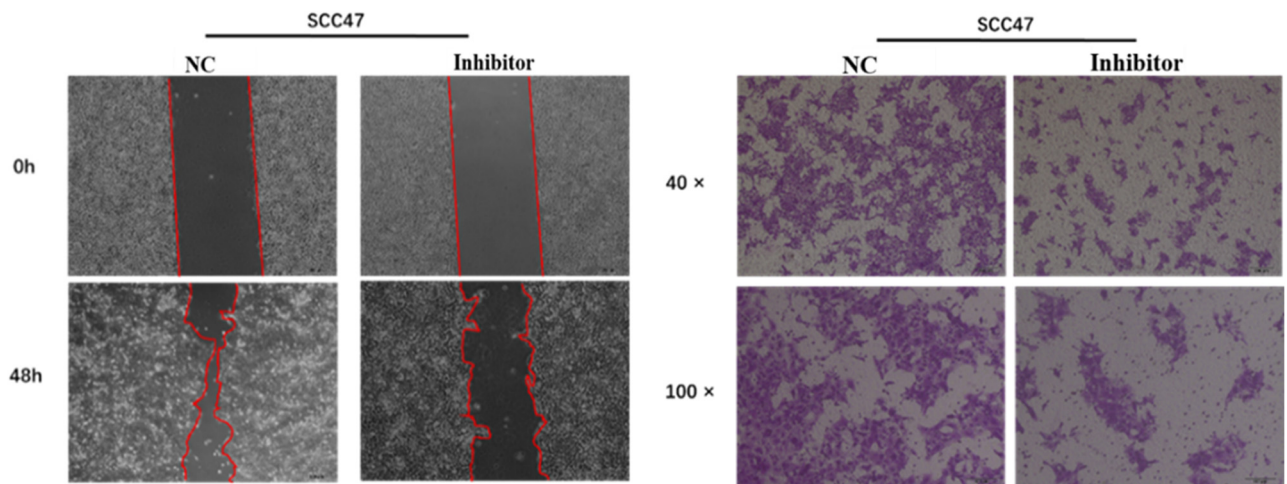

**Figure S5.** The results of wound healing and transwell invasion assays between pseudosubstrate inhibitor and normal groups. The results showed that both the wounding healing areas and the invade cells number of SCC47 transfected with pseudosubstrate inhibitor were smaller than that of normal SCC47.

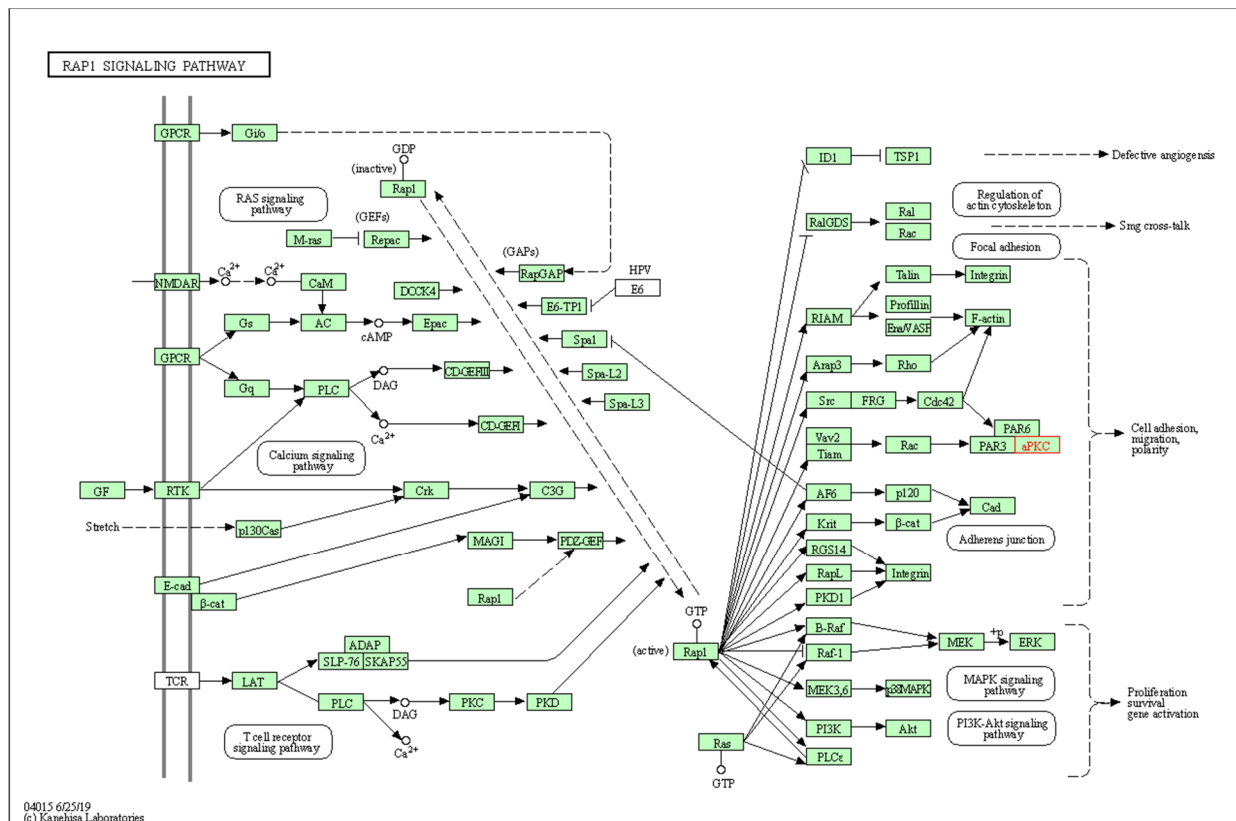

**Figure S6.** The KEGG pathways of RAP1 signaling pathway.
