# Supplementary material for: Hypermethylation of PRKCZ Regulated by E6 Inhibits Invasion and EMT via Cdc42 in HPV-Related Head and Neck Squamous Cell Carcinoma
Source: MDPI journal article supplement (doi:10.3390/cancers14174151), 2022-08-27
Supplement: s1 [file s1]

### The densitometry scans of each WB figure

|                           |           |           |           |           |           |
|---------------------------|-----------|-----------|-----------|-----------|-----------|
| Figure 2B<br>PKC- $\zeta$ | SCC090    | SCC47     | Cal27     | SCC25     | SCC9      |
| densitometry<br>readings  | 22675.196 | 21401.024 | 26081.489 | 33437.803 | 29158.853 |

|                          |           |           |           |           |
|--------------------------|-----------|-----------|-----------|-----------|
| Figure 2D PKC- $\zeta$   | 0uM       | 2.5uM     | 5uM       | 10uM      |
| densitometry<br>readings | 16112.752 | 19221.137 | 23306.258 | 36206.066 |

|                          |           |           |           |           |
|--------------------------|-----------|-----------|-----------|-----------|
| Figure 2F PKC- $\zeta$   | 0uM       | 2.5uM     | 5uM       | 10uM      |
| densitometry<br>readings | 16091.116 | 18844.995 | 23051.874 | 28825.752 |

|                          |           |          |
|--------------------------|-----------|----------|
| Figure 3A E6             | NC        | E6E7     |
| densitometry<br>readings | 75765.070 | 7114.886 |

|                          |           |          |
|--------------------------|-----------|----------|
| Figure 3A E7             | NC        | E6E7     |
| densitometry<br>readings | 84038.371 | 5694.690 |

|                                 |           |           |           |
|---------------------------------|-----------|-----------|-----------|
| Figure 3B PKC- $\zeta$<br>SCC47 | NC        | Si-1      | Si-2      |
| densitometry<br>readings        | 43611.108 | 19217.108 | 24387.380 |

|                                      |           |           |           |
|--------------------------------------|-----------|-----------|-----------|
| Figure 3B PKC- $\zeta$<br>Cal27+E6E7 | NC        | Si-1      | Si-2      |
| densitometry<br>readings             | 45924.794 | 25272.723 | 28010.652 |

|                          |           |           |
|--------------------------|-----------|-----------|
| Figure 3G PKC- $\zeta$   | NC        | Inhibitor |
| densitometry<br>readings | 80983.655 | 9182.865  |

|                       |           |           |           |          |
|-----------------------|-----------|-----------|-----------|----------|
| Figure 4B E6          | NC        | E6-Si1    | E6-Si2    | E6-Si3   |
| densitometry readings | 40910.551 | 27309.288 | 15009.288 | 4991.004 |

|                       |           |           |           |           |
|-----------------------|-----------|-----------|-----------|-----------|
| Figure 4B E7          | NC        | E7-Si1    | E7-Si2    | E7-Si3    |
| densitometry readings | 31547.844 | 21709.388 | 10385.459 | 13355.510 |

|                       |           |           |           |
|-----------------------|-----------|-----------|-----------|
| Figure 4E<br>DNMT1    | NC        | si-E6     | si-E7     |
| densitometry readings | 52732.108 | 36633.673 | 42763.229 |

|                       |           |           |           |
|-----------------------|-----------|-----------|-----------|
| Figure 4E<br>DNMT3a   | NC        | si-E6     | si-E7     |
| densitometry readings | 55558.652 | 44572.158 | 41140.350 |

|                       |           |           |           |
|-----------------------|-----------|-----------|-----------|
| Figure 4E<br>DNMT3b   | NC        | si-E6     | si-E7     |
| densitometry readings | 49426.593 | 36334.823 | 44371.765 |

|                                 |           |           |
|---------------------------------|-----------|-----------|
| Figure 5C PKC- $\zeta$<br>SCC47 | NC        | Si        |
| densitometry readings           | 59288.090 | 29871.312 |

|                          |           |           |
|--------------------------|-----------|-----------|
| Figure 5C Cdc42<br>SCC47 | NC        | Si        |
| densitometry readings    | 51025.111 | 22605.392 |

|                                      |           |            |
|--------------------------------------|-----------|------------|
| Figure 5C PKC- $\zeta$<br>Cal27+E6E7 | NC        | Si         |
| densitometry readings                | 50535.614 | 233941.828 |

|                               |           |           |
|-------------------------------|-----------|-----------|
| Figure 5C Cdc42<br>Cal27+E6E7 | NC        | Si        |
| densitometry readings         | 49249.475 | 21817.907 |

|                          |           |           |
|--------------------------|-----------|-----------|
| Figure 5D E-cad<br>SCC47 | NC        | Si        |
| densitometry readings    | 68553.894 | 81476.593 |

|                          |           |           |
|--------------------------|-----------|-----------|
| Figure 5D N-cad<br>SCC47 | NC        | Si        |
| densitometry readings    | 71276.149 | 37425.655 |

|                        |           |            |
|------------------------|-----------|------------|
| Figure 5D Vim<br>SCC47 | NC        | Si         |
| densitometry readings  | 47936.279 | 240568.247 |

|                               |           |           |
|-------------------------------|-----------|-----------|
| Figure 5D E-cad<br>Cal27+E6E7 | NC        | Si        |
| densitometry readings         | 54220.966 | 76017.907 |

|                               |           |           |
|-------------------------------|-----------|-----------|
| Figure 5D N-cad<br>Cal27+E6E7 | NC        | Si        |
| densitometry readings         | 65078.785 | 35048.371 |

|                             |           |           |
|-----------------------------|-----------|-----------|
| Figure 5D Vim<br>Cal27+E6E7 | NC        | Si        |
| densitometry readings       | 70724.777 | 54478.505 |
